# Supplementary material
Source: PubMed Central journal article supplement (PMC7181344)

Supp Figure 5: Exposure to O<sub>3</sub> was Significantly Associated with the Log Ratio of *Bacteroides caecimuris* vs. *Leuconostoc spp* using Songbird

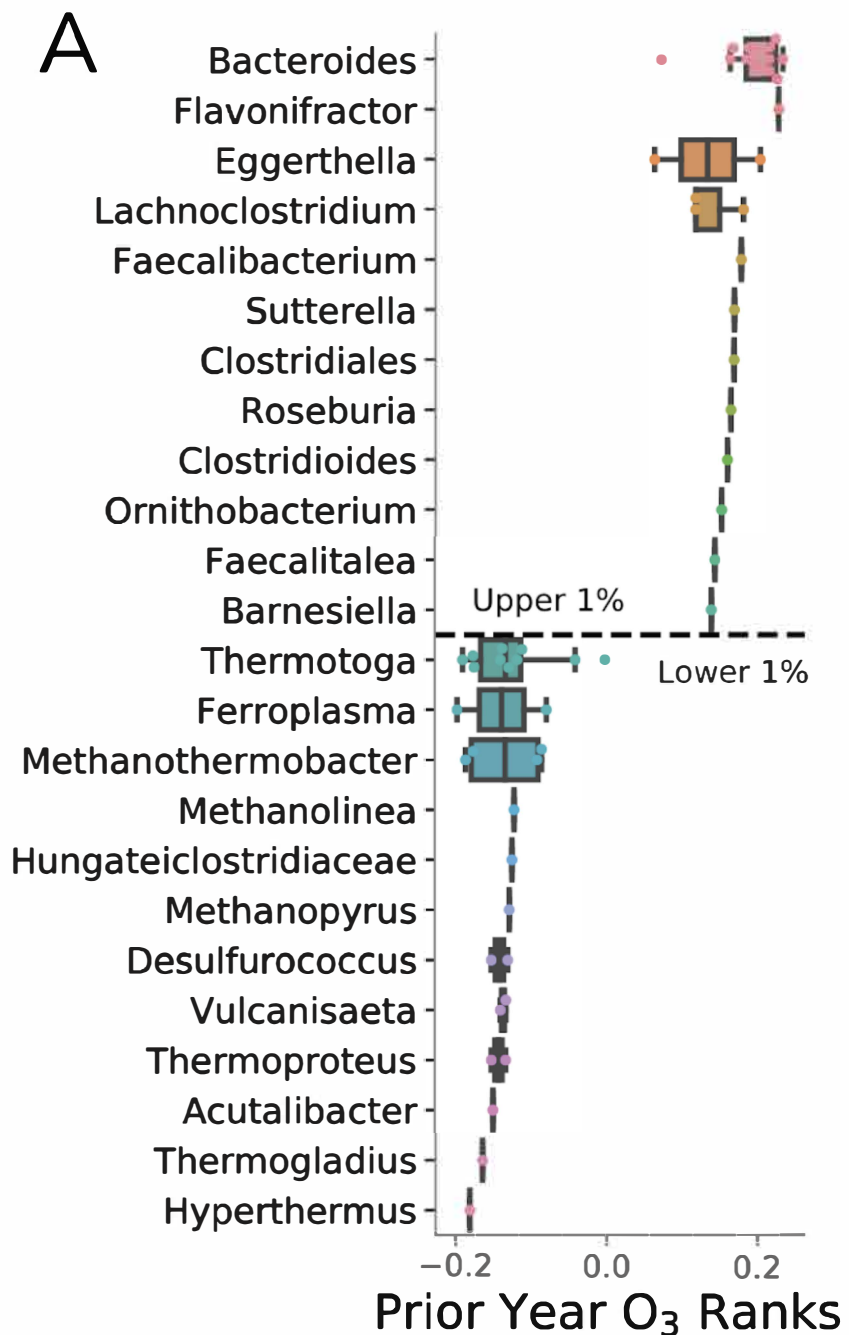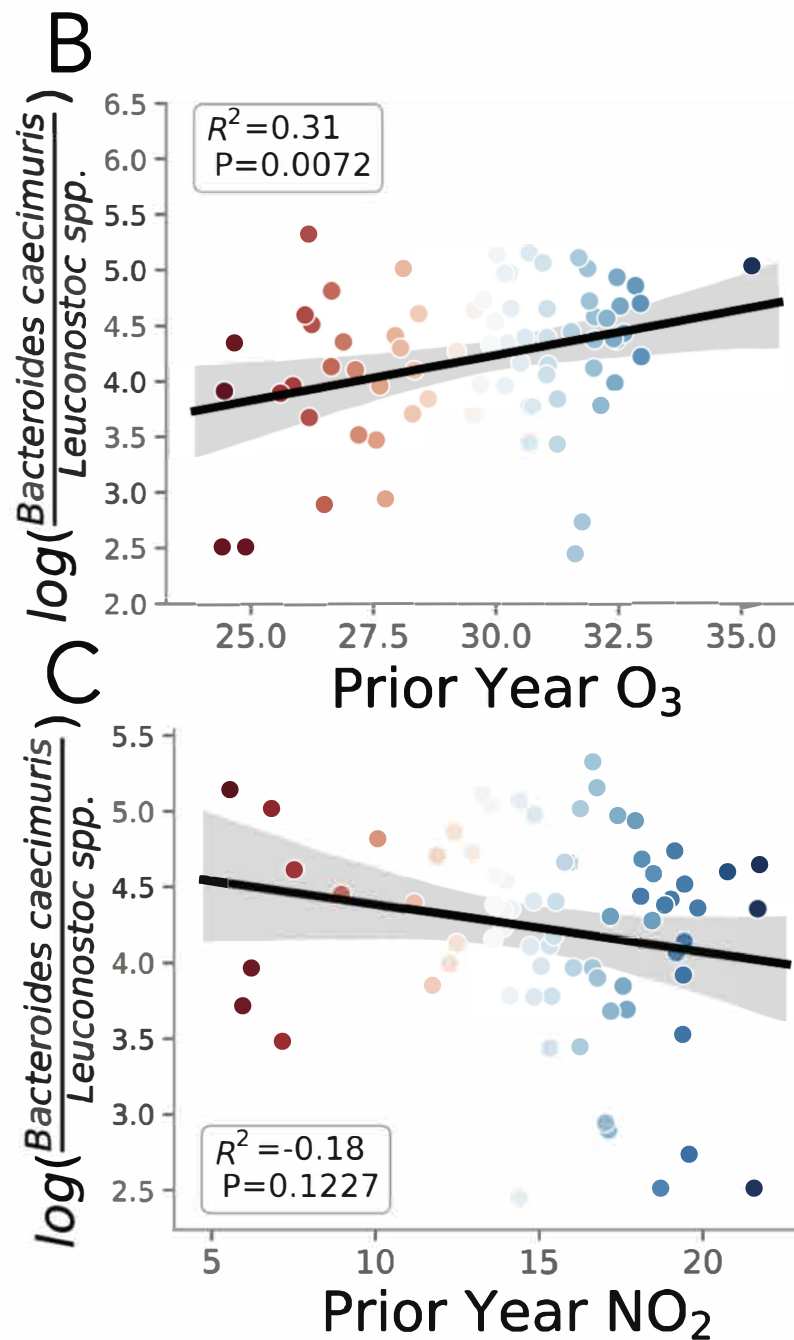

Supplement: NIHMS1573338-supplement-10.pdf [file NIHMS1573338-supplement-10.pdf]
