# Supplementary material
Source: PubMed Central journal article supplement (PMC7181344)

Supp Figure 6: Exposure to O<sub>3</sub> was Significantly Associated with a Higher Relative Abundance of *Bacteroides* and a Lower Diversity and Evenness Using Whole Genome Sequencing (WGS) Data that were Taxonomically Classified by MetaPhlan2

A

Bacteroides

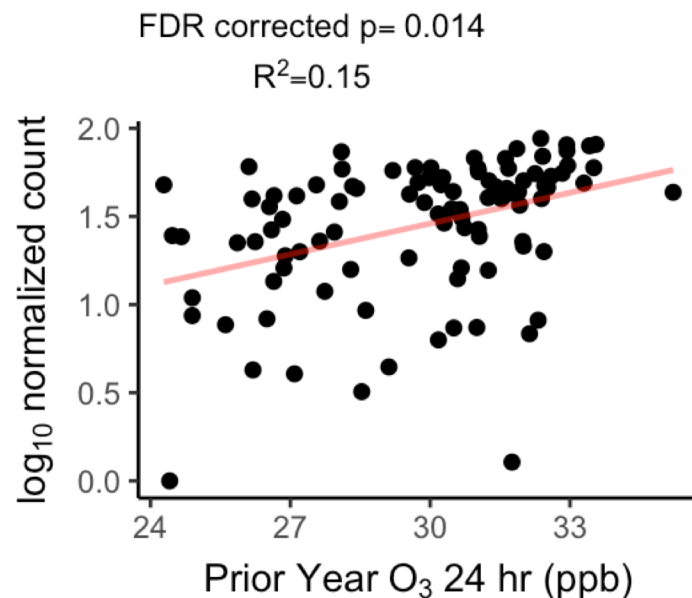

B

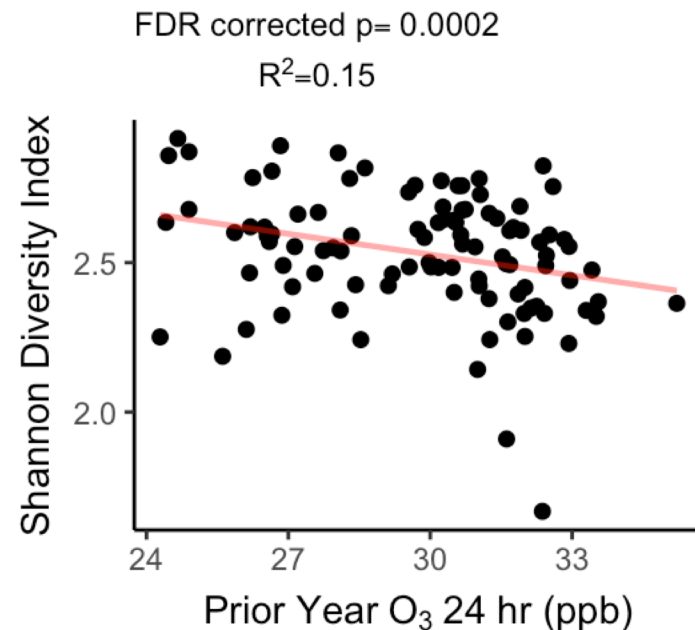

C

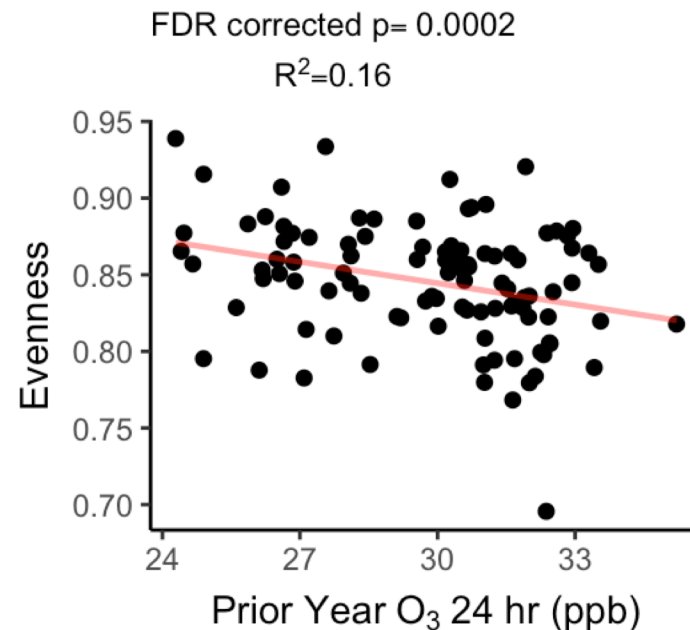

Supplement: NIHMS1573338-supplement-11.pdf [file NIHMS1573338-supplement-11.pdf]
